# Supplementary material for: Long-Term Effects of Animal Manures on Nutrient Recovery and Soil Quality in Acid Typic Hapludalf under No-Till Conditions
Source: MDPI journal article supplement (doi:10.3390/agronomy12020243), 2022-01-19
Supplement: s1 [file s1]

Supplementary Table S1. Total elements (mean ± standard deviation) supplied by the fertilization regime

| Fertilizer                                                               | C                              | N        | P        | K        | Ca       | Mg                            | Cu       | Zn      | Mn        |
|--------------------------------------------------------------------------|--------------------------------|----------|----------|----------|----------|-------------------------------|----------|---------|-----------|
|                                                                          | -----kg ha <sup>-1</sup> ----- |          |          |          |          | -----g ha <sup>-1</sup> ----- |          |         |           |
| Total element inputs from fertilizers over the experimental period       |                                |          |          |          |          |                               |          |         |           |
| Control                                                                  | 0                              | 0        | 0        | 0        | 0        | 0                             | 0        | 0       | 0         |
| Mineral                                                                  | 0                              | 2110±106 | 589±35   | 30±9     | 0        | 0                             | 0        | 0       | 0         |
| Cattle Slurry                                                            | 30131±2348                     | 3917±267 | 1239±127 | 1746±44  | 2899±96  | 991±38                        | 16±2     | 29±1    | 33±1      |
| Pig deep litter                                                          | 77142±5995                     | 3210±99  | 1825±149 | 4246±363 | 7723±513 | 1847±121                      | 22±2     | 107±6   | 69±2      |
| Pig Slurry                                                               | 19319±3072                     | 2512±119 | 1379±102 | 2707±266 | 892±33   | 340±10                        | 37±2     | 92±2    | 70±2      |
| Total element inputs from leftover residues over the experimental period |                                |          |          |          |          |                               |          |         |           |
| Control                                                                  | 31329±482                      | 2990±44  | 431±5    | 3069±49  | 799±36   | 523±10                        | 4640±66  | 1491±20 | 8502±124  |
| Mineral                                                                  | 51725±1012                     | 4935±80  | 712±10   | 5067±94  | 1313±58  | 860±13                        | 7665±130 | 2464±41 | 14044±222 |
| Cattle Slurry                                                            | 48363±1553                     | 5743±179 | 812±16   | 5883±182 | 1652±133 | 1026±45                       | 8588±77  | 2772±38 | 15861±248 |

|                                                       |            |            |          |          |          |         |          |         |           |
|-------------------------------------------------------|------------|------------|----------|----------|----------|---------|----------|---------|-----------|
| Pig deep litter                                       | 33702±4961 | 6007±204   | 863±18   | 6063±214 | 1722±145 | 1092±48 | 9111±96  | 2901±48 | 16166±314 |
| Pig Slurry                                            | 65446±513  | 6624±206   | 944±18   | 6760±215 | 1874±145 | 1185±48 | 10035±67 | 3221±42 | 18294±268 |
| Element outputs by grain over the experimental period |            |            |          |          |          |         |          |         |           |
| Control                                               | -          | 457±12     | 105±5    | 159±1    | 21±1     | 47±0    | 802±33   | 42±1    | 201±1     |
| Mineral                                               | -          | 818±20     | 189±8    | 282±1    | 36±2     | 82±0    | 1445±53  | 75±1    | 356±1     |
| Cattle Slurry                                         | -          | 1048±7     | 236±7    | 372±7    | 52±5     | 110±3   | 1816±44  | 102±5   | 472±11    |
| Pig deep litter                                       | -          | 1370±4     | 308±8    | 489±12   | 69±7     | 145±5   | 2368±49  | 134±7   | 621±17    |
| Pig Slurry                                            | -          | 1143±8     | 261±6    | 399±6    | 53±4     | 117±3   | 2003±41  | 107±4   | 505±9     |
| Elemental budgets over the experimental period        |            |            |          |          |          |         |          |         |           |
| Control                                               | 34461±530  | 2990±44    | 431±5    | 3069±49  | 799±36   | 523±10  | 4640±66  | 1491±20 | 8502±124  |
| Mineral                                               | 56897±1113 | 7045±182   | 1301±45  | 5097±98  | 1313±58  | 860±13  | 7665±130 | 2464±41 | 14044±222 |
| Cattle Slurry                                         | 8331±818   | 25276±3544 | 2051±136 | 7630±221 | 4551±206 | 2017±82 | 8604±78  | 2801±39 | 15894±248 |

|                 |             |            |          |           |          |          |          |         |           |
|-----------------|-------------|------------|----------|-----------|----------|----------|----------|---------|-----------|
| Pig deep litter | 114214±1310 | 9216±262   | 2688±166 | 10309±570 | 9445±653 | 2939±166 | 9133±97  | 3007±53 | 16235±316 |
| Pig Slurry      | 91309±2701  | 14423±1126 | 2323±119 | 9468±481  | 2766±162 | 1525±47  | 10072±66 | 3313±41 | 18364±267 |

---

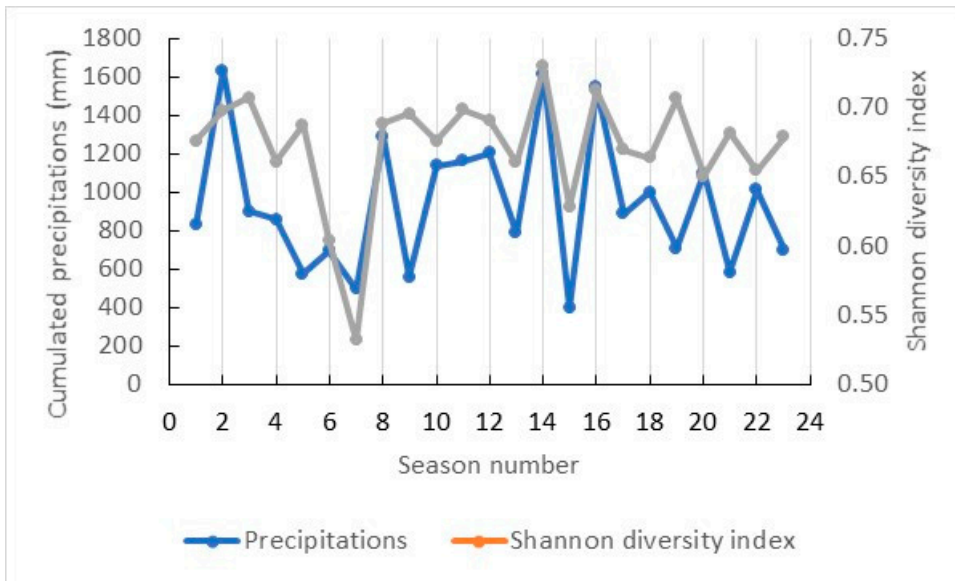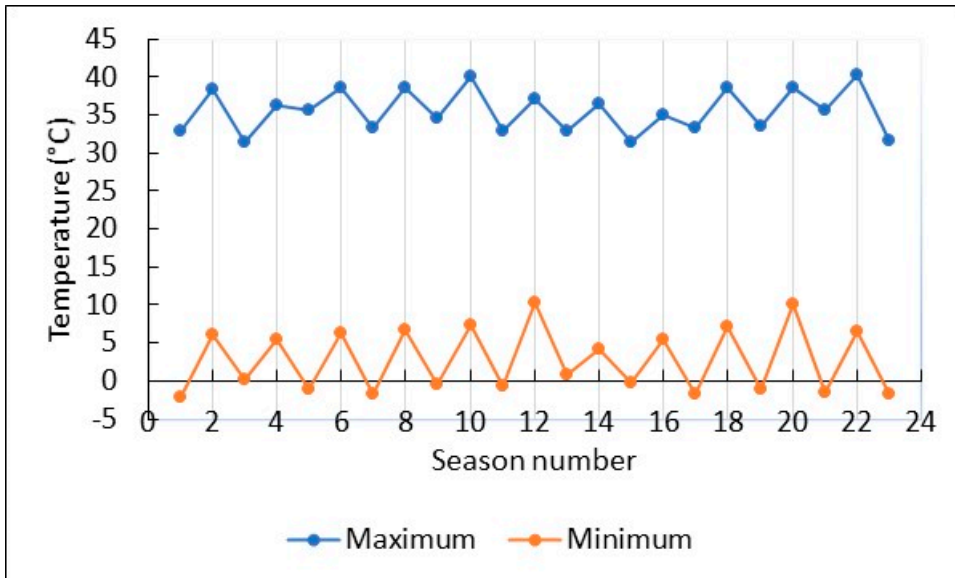

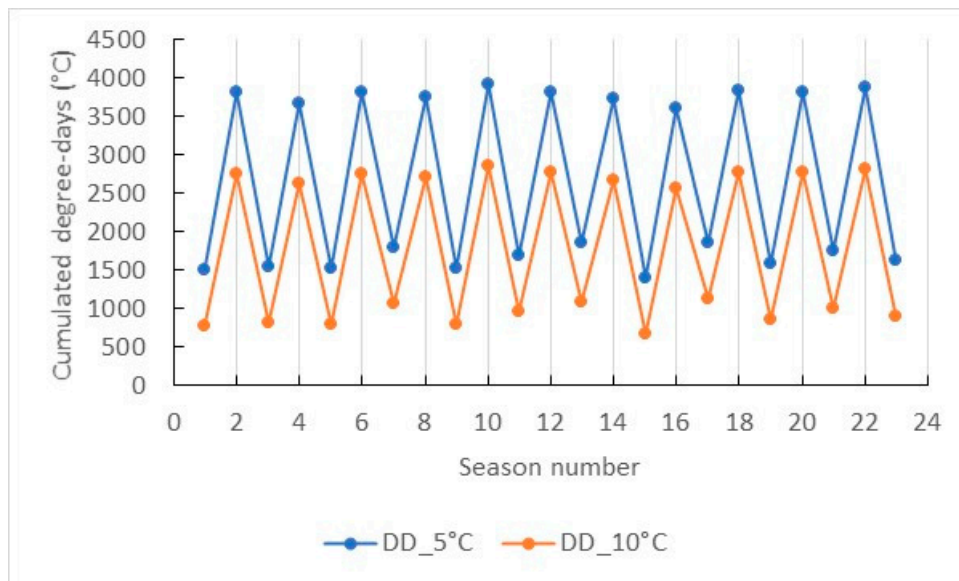

Figure S1. Change in climatic across seasons between winter 2009(#1) and winter 2020 (#23). Winter and summer periods extend from May through September and from October to April, respectively.
